# Supplementary material for: Enantiomeric Complexes Based on Ruthenium(III) and 2,2′-Biimidazole: X-ray Structure and Magnetic Properties
Source: MDPI journal article supplement (doi:10.3390/molecules28207213), 2023-10-22
Supplement: s1 [file s1]

## Supplementary Information (SI)

### Enantiomeric Complexes Based on Ruthenium(III) and 2,2'-Biimidazole: X-ray Structure and Magnetic Properties

Marta Orts-Arroyo, Joel Monfort, Nicolás Moliner and José Martínez-Lillo \*

Instituto de Ciencia Molecular (ICMol)/Departament de Química Inorgànica, Universitat de València, c/Catedrático José Beltrán 2, Paterna, 46980 València, Spain; marta.orts-arroyo@uv.es (M.O.-A.); monrijo@alumni.uv.es (J.M.); fernando.moliner@uv.es (N.M.)

\* Correspondence: f.jose.martinez@uv.es; Tel.: +34-9635-44460

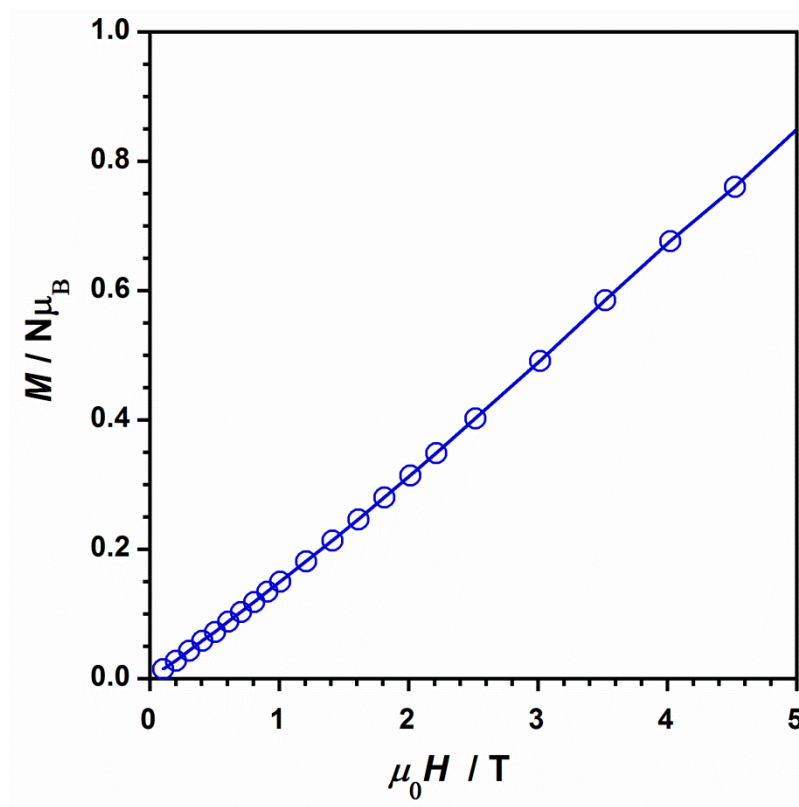

**Figure S1.** Plot of  $M$  versus  $H$  measured at 2.0 K for compound **2**. The solid blue line represents just a guide for the eye.
